# Supplementary material
Source: Research Square preprint supplement (doi:10.21203/rs.3.rs-8930103/v1)
Supplement: Supplementary file 1 [file bb1faeb80af6b08562d283c0.docx]

## Supporting Information

## ITN use model formulation

The statistical model used for ITN use is given in equation S1.

**Equation S1: Statistical model developed for ITN use**

With,

- Outcome (*Y*): 1 = slept under an ITN, 0 = did not
- ITNs per person (*ITNPP*): natural cubic spline with 3 degrees of freedom *f1*
- *Age*: natural spline with 4 degrees of freedom *f2*
- Survey Time Point (*TP*): Baseline and Follow-up
- Household size (*HHSize*) Numeric, number of people in household
- *Gender*: Levels: Male and female
- Interaction between *Age* and *TP,* *f3*
- Random intercepts for villages and random slopes for *TP*:
- Random intercepts for households:
- Random intercepts for people:

The regression parameters resulting from the model fit to the data are given in Table S1 and S2.

Table S1: ITN use model multilevel hyperparameters (random effects)

| **Parameter** | **Estimate (95% CI)** | **PTAP** |
| --- | --- | --- |
| sd(Household Intercept) | 1.52 (1.35, 1.70) | <0.001 |
| sd(Person Intercept) | 0.13 (0.01, 0.36) | <0.001 |
| sd(Village Intercept) | 0.68 (0.37, 1.19) | <0.001 |
| sd(Village TP slope) | 0.35 (0.06, 0.72) | <0.001 |
| cor(Village Intercept, TP slope) | 0.22 (–0.49, 0.82) | 0.544 |

**Table S2: ITN use model regression coefficients (fixed effects)**

| **Coefficient** | **Estimate (95% CI)** | **PTAP** |
| --- | --- | --- |
| Intercept | –0.12 (–0.94, 0.73) | 0.761 |
| ITNpp_ns1* | 3.09 (2.50, 3.69) | <0.001 |
| ITNpp _ns2* | 9.17 (7.95, 10.38) | <0.001 |
| ITNpp _ns3* | 2.13 (1.02, 3.28) | <0.001 |
| Age_ns1* | –1.74 (–2.24, –1.25) | <0.001 |
| Age _ns2* | –0.53 (–1.18, 0.11) | 0.110 |
| Age _ns3* | –2.50 (–3.59, –1.39) | <0.001 |
| Age _ns4* | –1.02 (–2.30, 0.25) | 0.117 |
| TP (Follow-up) | 0.87 (0.17, 1.57) | 0.013 |
| HHSize | –0.07 (–0.11, –0.02) | 0.002 |
| Gender (male) | –0.69 (–0.86, –0.52) | <0.001 |
| Age_ns1* × TP (Follow-up) | –0.32 (–1.07, 0.41) | 0.396 |
| Age_ns2* × TP (Follow-up) | –1.17 (–2.07, –0.30) | 0.006 |
| Age_ns3* × TP (Follow-up) | –1.34 (–2.86, 0.15) | 0.08 |
| Age_ns4* × TP (Follow-up) | 0.39 (–1.20, 2.08) | 0.65 |

*spline parameters

## ITN sharing model formulation

The statistical model used for ITN sharing is given in equation S2.

**Equation S2: Statistical model developed for ITN sharing**

With,

- Outcome (*Y*): 1 = shared ITN with at least one other person, 0 = did not
- ITNs per person (*ITNPP*): natural cubic spline with 2 degrees of freedom *f1*
- *Age*: natural spline with 5 degrees of freedom *f2*
- Survey Time Point (*TP*): Baseline and Follow-up
- Household size (*HHSize*) Numeric, number of people in household
- *Gender*: Levels: Male and female
- Interaction between *Age* and *Gender,* *f3*
- Random intercepts for villages and random slopes for *TP*:
- Random intercepts for households:
- Random intercepts for people:

The regression parameters resulting from the model fit to the data are given in Table S3 and S4.

Table S3: ITN sharing model multilevel hyperparameters (random effects)

| **Parameter** | **Estimate (95% CI)** | **PTAP** |
| --- | --- | --- |
| sd(Household Intercept) | 0.76 (0.58, 0.94) | <0.001 |
| sd(Person Intercept) | 1.26 (0.96, 1.56) | <0.001 |
| sd(Village Intercept) | 0.15 (0.01, 0.38) | <0.001 |
| sd(Village TP slope) | 0.34 (0.05, 0.70) | <0.001 |
| cor(Village Intercept, TP slope) | -0.05 (–0.79, 0.78) | 0.901 |

Table S4: ITN sharing model regression coefficients (fixed effects)

| **Coefficient** | **Estimate (95% CI)** | **PTAP** |
| --- | --- | --- |
| Intercept | 7.42 (6.44, 8.43) | <0.001 |
| ITNpp_ns1* | –9.26 (–10.40, –8.09) | <0.001 |
| ITNpp_ns2* | –3.68 (–4.60, –2.77) | <0.001 |
| Age_ns1* | –4.40 (–5.24, –3.60) | <0.001 |
| Age_ns2* | –0.16 (–1.04, 0.71) | 0.698 |
| Age_ns3* | –3.18 (–4.11, –2.29) | <0.001 |
| Age_ns4* | –2.92 (–4.51, –1.35) | <0.001 |
| Age_ns5* | –5.56 (–7.02, –4.12) | <0.001 |
| Gender (male) | –0.03 (–0.85, 0.78) | 0.950 |
| TP (Follow-up) | 0.25 (–0.05, 0.53) | 0.088 |
| HHSize | 0.01 (–0.02, 0.05) | 0.483 |
| Age_ns1* × Gender (male) | –0.10 (–1.11, 0.92) | 0.833 |
| Age_ns2* × Gender (male) | –3.03 (–4.09, –1.96) | <0.001 |
| Age_ns3* × Gender (male) | –0.55 (–1.71, 0.58) | 0.362 |
| Age_ns4* × Gender (male) | –1.20 (–3.04, 0.65) | 0.208 |
| Age_ns5* × Gender (male) | –0.54 (–2.33, 1.24) | 0.552 |

* spline parameters

## Proportion of ITNs ‘kept for later’ model formulation

The statistical model for the proportion of ITNs reserved for later us is given in equation S3.

Let:

- *Yi* = proportion of ITN retained for later use for observation *i*
- *pi*= expected probability of ITN retained for later use
- *ITNPPi* = ITNs per person for observation i

The GAM is:

With:

Where:

- *β0*is the intercept,
- *f ()* is a smooth function estimated using a penalised thin-plate regression spline with 5 basis dimensions,
- *ϕ* is the dispersion parameter.

The regression parameters resulting from the model fit to the data are given in Table S5.

Table S5: ITNs ‘kept for later’ model regression coefficients

| **Term** | **Estimate (95% CI) / EDF*** | **p** |
| --- | --- | --- |
| Intercept (β₀) | –1.99 (–2.17, –1.80) | < 0.001 |
| s(ITNPP) | EDF = 2.843 | < 0.001 |

*EDF: Effective degrees of freedom
